# Supplementary material for: Structure, spectroscopic properties and optical temperature-sensing behavior of glass-ceramics containing polymorphic CaTa2O6:Er3+/Yb3+ nanocrystals
Source: Royal Society of Chemistry journal article supplement (doi:10.1039/d4tc02541e), 2024-01-01
Supplement: d4tc02541e1.pdf [file d4tc02541e1.pdf]

## Supporting information

Structure, spectroscopic properties and optical temperature  
sensing behavior of glass-ceramics containing polymorphic

$\text{CaTa}_2\text{O}_6$ :  $\text{Er}^{3+}/\text{Yb}^{3+}$  nanocrystals

Chen Tian<sup>a,b</sup>, Jian Ruan<sup>\*a,c</sup>, Xiujian Zhao<sup>\*a,c</sup>, Jianjun Han<sup>a,c</sup>, Chao Liu<sup>a,c</sup>

<sup>a</sup> State Key Laboratory of Silicate Materials for Architectures, Wuhan University of  
Technology, Wuhan 430070, China

<sup>b</sup> International School of Materials Science and Engineering, Wuhan University of  
Technology, Wuhan 430070, China

<sup>c</sup> Specialty Glass Engineering Technology Research Center of Hubei Province, 122  
Luoshi Road, Wuhan, 430070, China)

\*Corresponding authors

E-mail address: [jian\\_ruan@whut.edu.cn](mailto:jian_ruan@whut.edu.cn) (J. Ruan), [opluse@whut.edu.cn](mailto:opluse@whut.edu.cn) (X. Zhao)

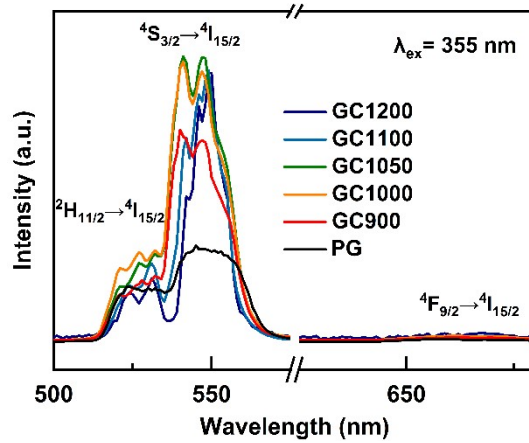

Fig. S1 Photoluminescence spectra of PG and GCs under 355 nm excitation.

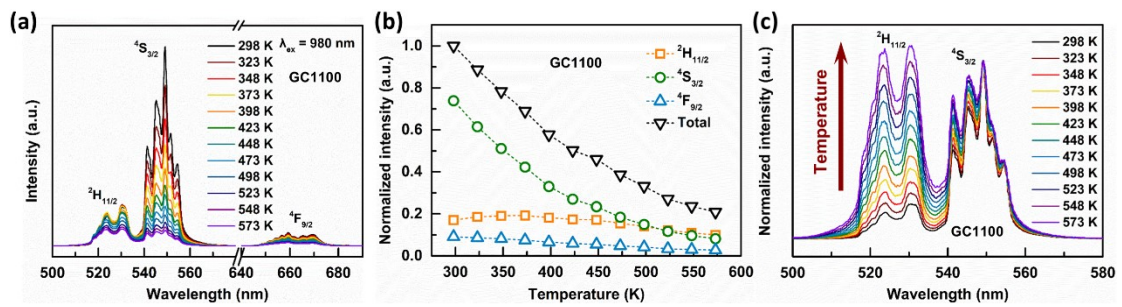

Fig. S2 (a) Temperature-dependent spectra, (b) the corresponding integrated intensity and (c) normalized UC emission spectra of GC1100 under 980 nm excitation.

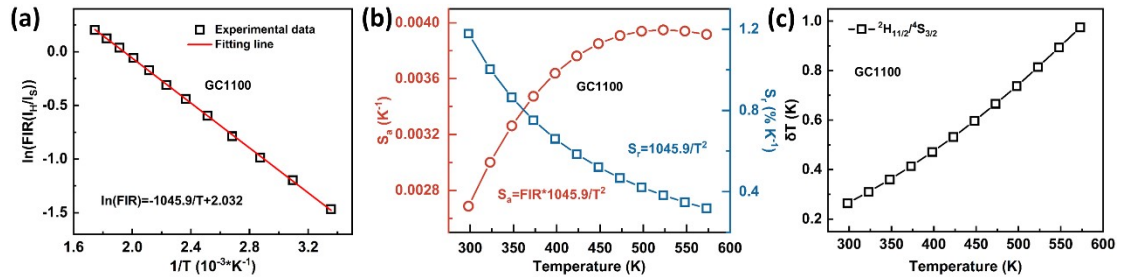

Fig. S3 (a) Experimental and the linear fitted  $\ln(\text{FIR})$  versus  $1/T$  of the two TCLs ( ${}^2\text{H}_{11/2}/{}^4\text{S}_{3/2}$ ) for GC1100. (b) Relative sensitivity and absolute sensitivity variation with temperature for GC1100. (c) Temperature resolution of TCLs ( ${}^2\text{H}_{11/2}/{}^4\text{S}_{3/2}$ ) for GC1100.

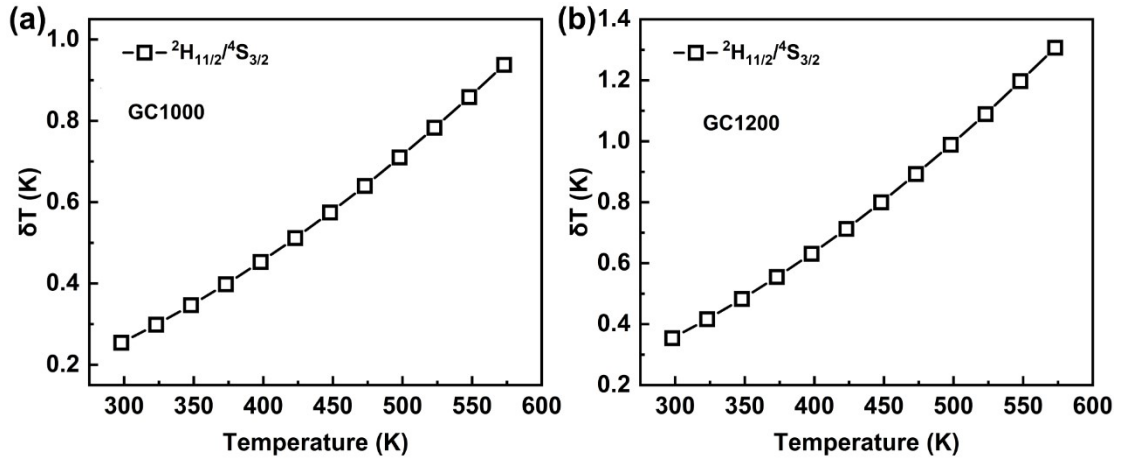

Fig. S4 Temperature resolution of TCLs ( $^2\text{H}_{11/2}/^4\text{S}_{3/2}$ ) of (a) GC1000 and (b) GC1200.

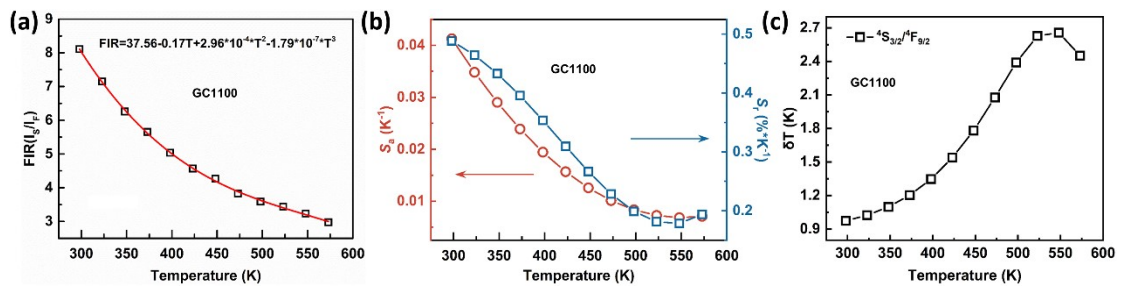

Fig. S5 (a) Experimental and the fitted FIR of the two NTCLs ( $^4\text{S}_{3/2}/^4\text{F}_{9/2}$ ) for GC1100

(b) Relative sensitivity and absolute sensitivity variation with temperature for

GC1100. (c) Temperature resolution of NTCLs ( $^4\text{S}_{3/2}/^4\text{F}_{9/2}$ ) of GC1100.

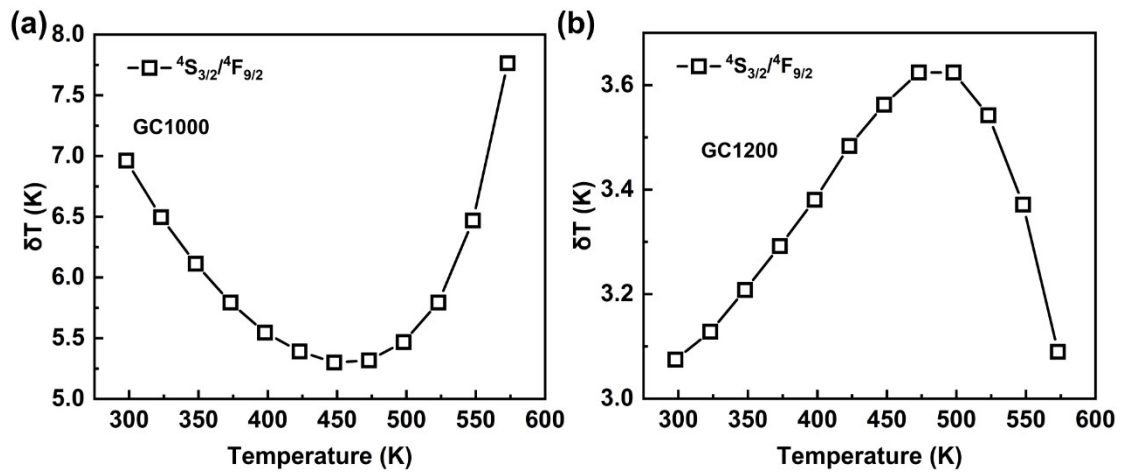

Fig. S6 Temperature resolution of NTCLs ( $^4\text{S}_{3/2}/^4\text{F}_{9/2}$ ) of (a) GC1000 and (b) GC1200.

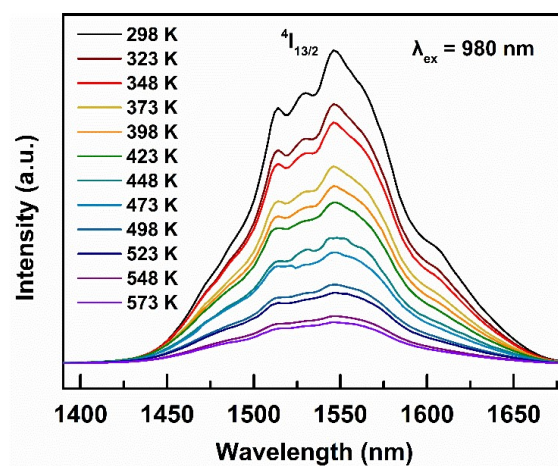

Fig. S7 Temperature dependence of NIR emission spectra of GC1000 from 298 to 573

K under the 980 nm excitation.

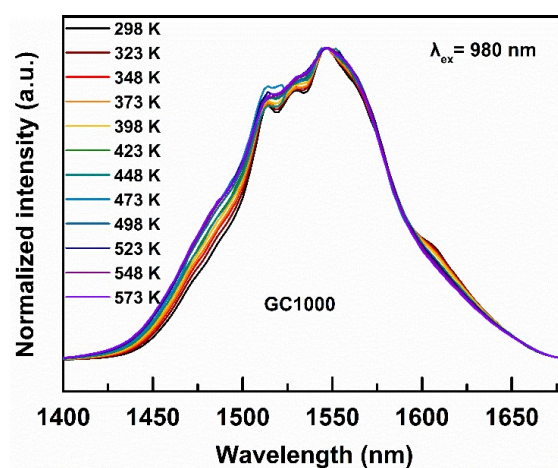

Fig. S8 Temperature dependence of normalized NIR emission spectra of GC1000

from 298 to 573 K under 980 nm excitation.

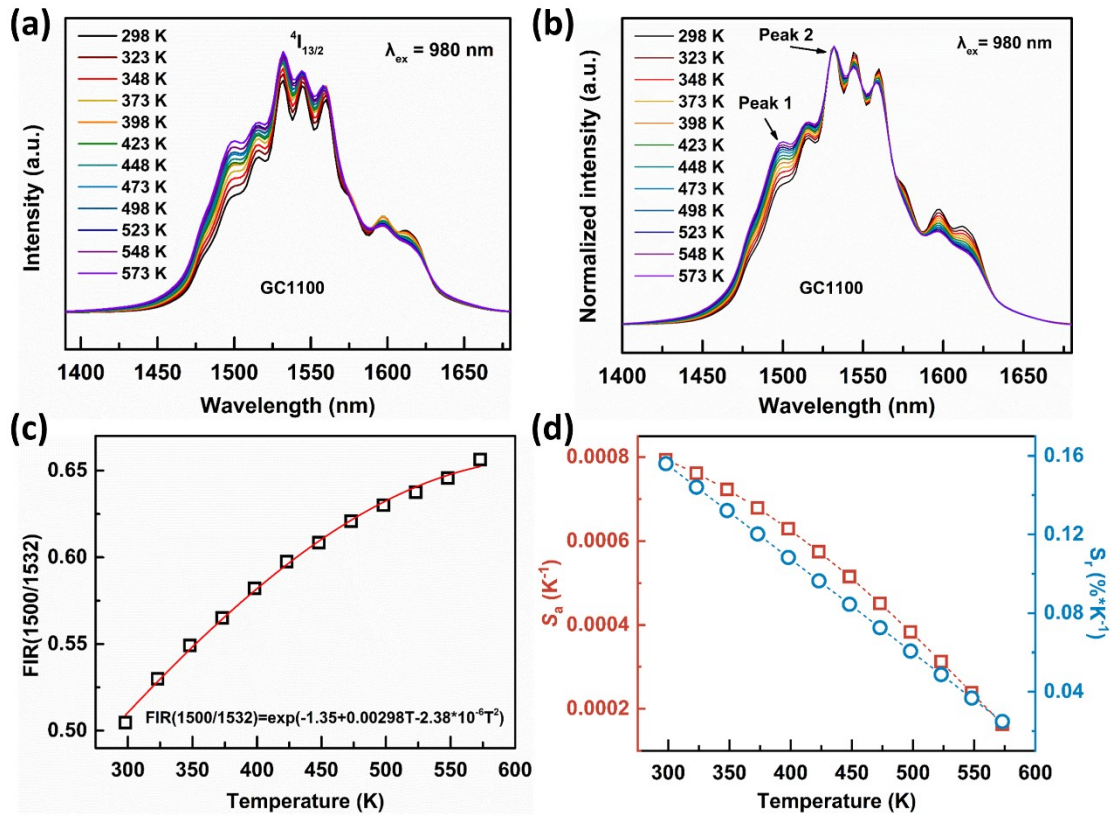

Fig. S9 Temperature dependence of (a) NIR emission spectra and (b) normalized NIR emission spectra of GC1100 from 298 to 573 K under 980 nm excitation. (c)

Temperature dependence of FIR value between  ${}^4I_{13/2}$  sublevels of  $Er^{3+}$  ions. (d) The curves of absolute sensitivity  $S_a$  and relative sensitivity  $S_r$ .

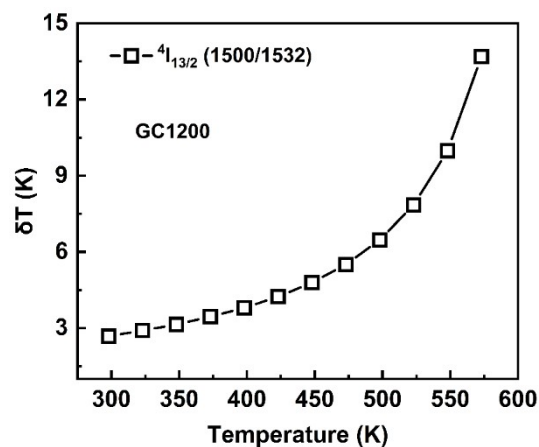

Fig. S10 Temperature resolution of the Stark sublevels ( ${}^4I_{13/2}$ ) of GC1200.
